# Supplementary material
Source: publisher figshare collection journal article supplement (https://tandf.figshare.com/ndownloader/files/22859549)
Supplement: Supplementary file 1 [file 22859549]

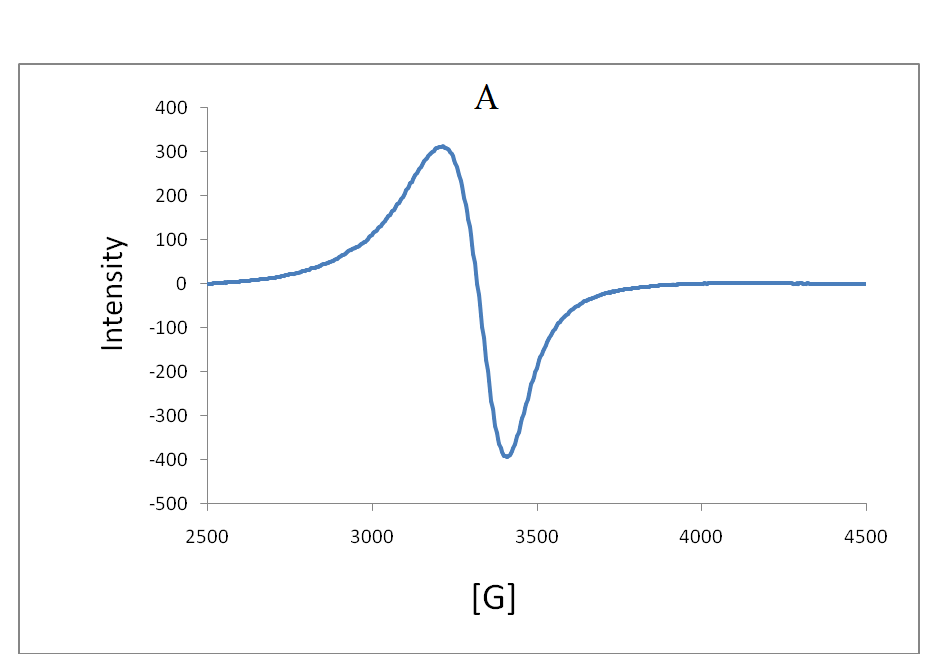


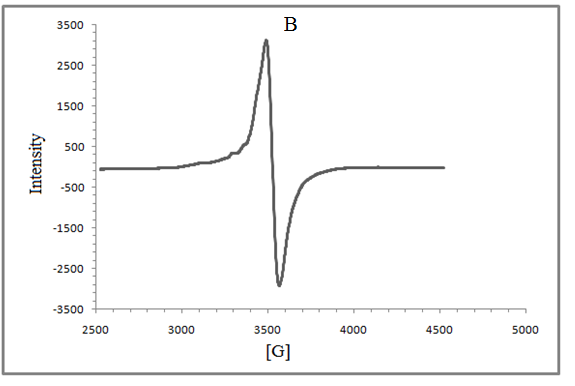


Fig. S1. X-band ESR spectrum of A: complex **1**; [Cu(L)(NO3)].EtOH and B: complex **2**; [Cu(L)2].1.5H2O.

Fig. S2. Thermograms of complexes **2** and **3**.

Fig. S3. Thermogram of complex **5**.


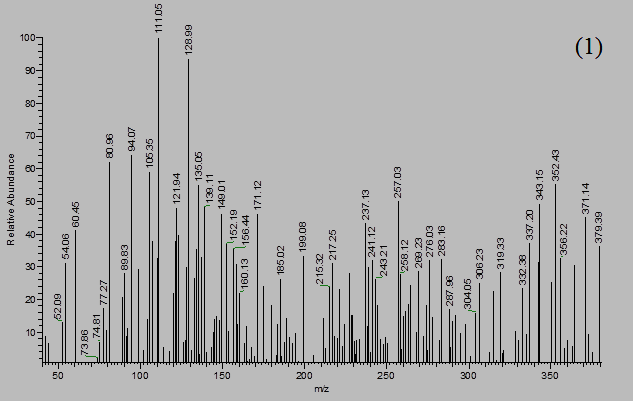


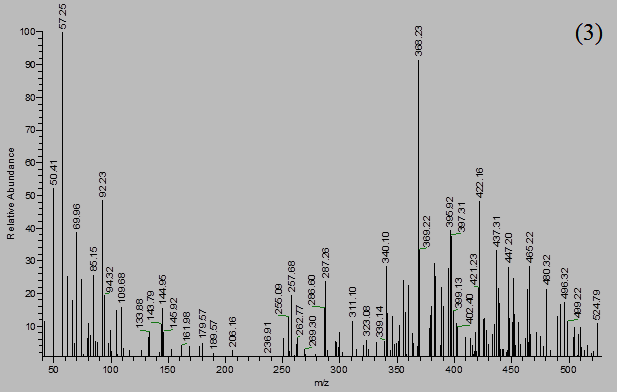


Fig. S4. Mass spectra of complexes **1** and **3**.


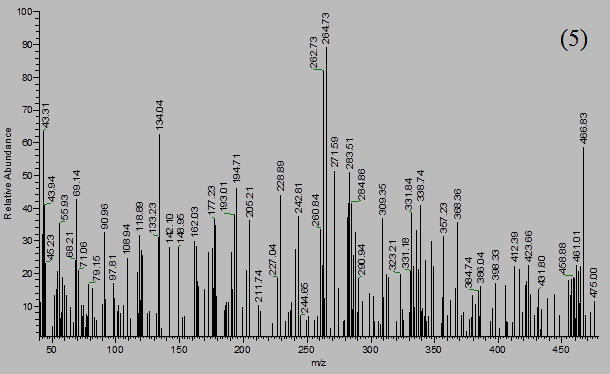


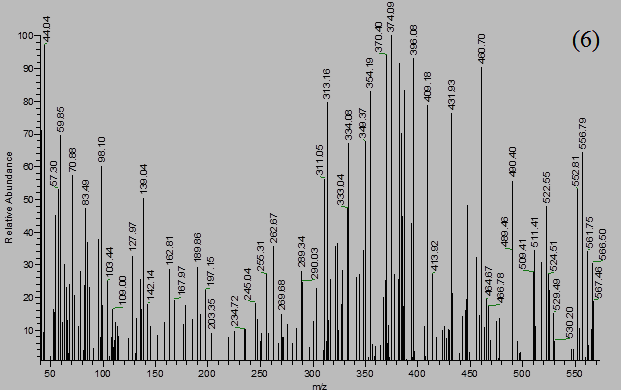


Fig. S5. Mass spectra of complexes **5** and **6**.


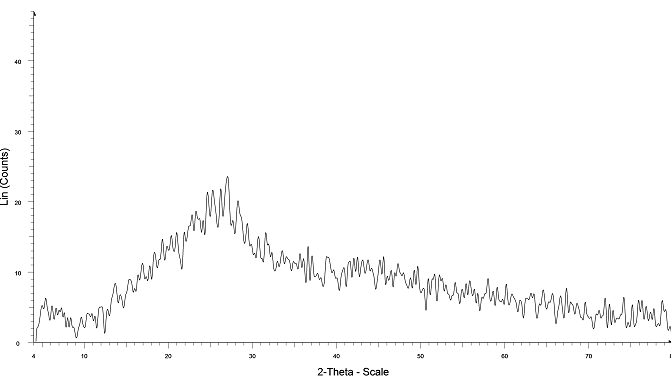


Fig. S6. XRD pattern of copper(II) nano complex **2**.
